# Supplementary material
Source: Research Square preprint supplement (doi:10.21203/rs.3.rs-9658888/v1)
Supplement: Supplementary file 1 [file 97e5e4db8c9ca8ae45a7513c.docx]

# Supplementary File 1 – Interview Schedules

## Clinician Interview Schedule

**Interview Aim:** To explore barriers and facilitators to implementing the co-designed parenting program at the collaborating health service.

**Research Question:** What are the potential **barriers and facilitators** to implementation from the perspectives of mental health service providers?

**NOTES**

- Interview questions will be based on the updated Consolidated Framework for Implementation Research (CFIR; Damschroder et al., 2022). The interviews will be semi-structured so questions are a guide only and not all questions will be asked to every staff member.
- If a question feels like it is probing for something the service provider has already spoken about, can consider saying something like ‘you already touched on this, did you have anything else to add’, demonstrating how the question differs from a previous question or skipping the question altogether if the content has been covered.
- As a general rule, probe for more information until you are confident that the participant has said all that they wish to on that topic. If unsure, say something like “do you have any other feedback about ___, before we move on?”

**General probes**

- Can you tell me more about that?
- How so?
- In what ways?
- Why / why is that / why was that the case for you?
- Why is that important to you? Why not?
- Could you give me an example?

**Checklist for beginning of interview**

- Thank participant for attending the interview
- Introduce self and project as a reminder
- Remind participant of the purpose of the interview and about the parenting program design
- Explain that both positive and negative feedback is important and welcome
- Explain that there will be set questions but also sharing of open feedback
- Explain that the interview will take around 45-60 minutes but can be longer or shorter depending on how much feedback the participant has
- Explain that they can change their mind and stop at any time if they just let us know.
- Remind about recording and explain:
  - Recording so we have an accurate record for the research
  - The recording will be stored securely and only accessible by the research team.
  - It will also be stored separately to any personal details about them such as their name and contact details.

***Is that OK with you?
Do you have any questions?***

*[answer questions as needed]*

**START RECORDING**

| **Topic**  **Priority 1 Questions**  **Priority 2 Questions** | **Question** |
| --- | --- |
| **Overall feedback** | - To start with, it would be great to hear about your overall impressions of the program. What are the main things you’d like to feedback about the program? - What are some of the key considerations that come to mind when it comes to implementing an innovation like this program? By implementing, I mean taking up new practices as part of your usual practices with the hope of improving the quality of the service. - *Shifting to a focus on supporting parents,* what can service providers do to support parent’s engagement with the program? By engagement, I mean choosing to start the program and sticking with it until completion. |
| **Innovation Domain**  **CFIR construct:**   - **Innovation Relative Advantage** - **Innovation Adaptability** - **Innovation Design** - **Innovation Cost** | - **Innovation Relative Advantage** - How does the program compare to current practice or other parenting support options that may have been considered, or that you know about at your service? *[focus on how this program is better/worse]* - **Innovation Adaptability** - How adaptable or tailorable is the program to the needs of parents? *[what features make it so?]* - How adaptable/tailorable is the program to service needs? - **Innovation Design** - Consider the program and the materials and resources that are provided with it. How well-designed is the program and its clinician-training components? Including look and feel. - How might this design affect implementation in your service? - **Innovation Cost** - What costs do you imagine could be incurred to implement the program? - How affordable do you imagine it would be? |
| **Inner Setting Domain**  **CFIR construct:**   - **Tension for Change** - **Relative Priority** - **Compatibility** - **Learning Centeredness** - **Incentive Systems** - **Mission Alignment** - **Available Resources** - **Access to Knowledge and Information** | - What do you think would be the general level of receptiveness in your service to implementing this program? *[from parents and clinicians]* - If you imagine implementing the program into your usual service provision, how complicated do you think it would be? - **Tension for Change** - To what extent is the program needed to meet the needs of parents at the service? - How do staff and parents at the service feel about current parenting programs or practices that are available for parents seeking mental health support? *[focus on what is missing/lacking]* - **Relative Priority** - What is the priority of implementing and delivering this program compared to other initiatives? - What kinds of things appear to have the highest priority for you and the service? - **Compatibility** - How well does the program seem to fit with existing work processes and practices in the service you offer? - What (if any) changes or alterations need to be made so the program will:   - work effectively in your existing service?   - meet parent needs?   - meet staff needs? - **Learning Centeredness** - To what extent do you feel like your organisation has shared values and norms around trying new things to improve and building on current work practices? - **Incentive Systems** - What incentives or disincentives are there that may influence implementation of the program? *This may include performance reviews, promotions, mandates, rewards or punishments.* - **Mission Alignment** - How does implementing this program align or not align with other organisational goals you currently have? With the mission and goals of the organisation as a whole? - **Available Resources** - To what extent are necessary resources available within your team to implement the program? E.g., funding/materials - Which resources are sufficient, and which are currently insufficient? - **Access to Knowledge and Information** - What are your thoughts about the training available to support implementation of the program? - What kinds of supervision and guidance are available at your organisation to support implementation of the program? - What supervision, guidance or training is missing? |
| **Individuals Domain**  **CFIR construct:**   - **High & Mid-level Leaders** - **Innovation Deliverers - Capability** - **Innovation Deliverers - Opportunity** - **Innovation Deliverers - Motivation** | - **High & Mid-level Leaders** - What kind of support or actions would you expect from supervisors/team leaders/managers at your organisation to help make the program implementation successful? *[ask separately about service managers vs team leaders]* - What is available? What is needed? - **Innovation Deliverers - Capability** - To what extent do clinicians have the competence, knowledge and skills to implement the program and engage in the clinician-support component? - **Innovation Deliverers - Opportunity** - To what extent do clinicians have the availability, scope and time to implement the program and engage in the clinician-support component? - **Innovation Deliverers - Motivation** - To what extent do you think clinicians will be committed and motivated to implementing the program? - What kinds of strategies do you think are needed to get staff on board with implementing the program along with other services? |
| **Other suggestions** | - Is there anything else you’d like to feedback about the program, or potential barriers and enablers to implementation? - Any final questions or comments? |
| **Conclusion** | - Thank for time. Conclude and sum up key insights - Remind of member checking of transcripts |

## Manager Interview Schedule

**Interview Aim:** To explore barriers and facilitators to implementing the co-designed parenting program at the collaborating health service.

**Research Question:** What are the potential **barriers and facilitators** to implementation from the perspectives of service managers?

**NOTES**

- Interview questions will be based on the updated Consolidated Framework for Implementation Research (CFIR; Damschroder et al., 2022). The interviews will be semi-structured so questions are a guide only and not all questions will be asked to every staff member.
- If a question feels like it is probing for something the manager has already spoken about, can consider saying something like ‘you already touched on this, did you have anything else to add’, demonstrating how the question differs from a previous question or skipping the question altogether if the content has been covered.
- As a general rule, probe for more information until you are confident that the participant has said all that they wish to on that topic. If unsure, say something like “do you have any other feedback about ___, before we move on?”

**General probes**

- Can you tell me more about that?
- How so?
- In what ways?
- Why / why is that / why was that the case for you?
- Why is that important to you? Why not?
- Could you give me an example?

**Checklist for beginning of interview**

- Thank participant for attending the interview
- Introduce self and project as a reminder
- Remind participant of the purpose of the interview and about the parenting program design
- Explain that both positive and negative feedback is important and welcome
- Explain that there will be set questions but also sharing of open feedback
- Explain that the interview will take around 45 minutes but can be longer or shorter depending on how much feedback the participant has
- Explain that they can change their mind and stop at any time if they just let us know.
- Remind about recording and explain:
  - Recording so we have an accurate record for the research
  - The recording will be stored securely and only accessible by the research team.
  - It will also be stored separately to any personal details about them such as their name and contact details.

***Is that OK with you?
Do you have any questions?***

*[answer questions as needed]*

**START RECORDING**

| **Topic**  **Priority 1 Questions**  **Priority 2 Questions** | **Question** |
| --- | --- |
| **Overall feedback** | - To start with, it would be great to hear about your overall impressions of the program. What are the main things you’d like to feedback about the program? - What are some of the key considerations that come to mind when it comes to implementing an innovation like this program? By implementing, I mean taking up new practices as part of = usual practices with the hope of improving the quality of the service. - *Shifting to a focus on supporting parents,* what can service providers do to support parent’s engagement with the program? By engagement, I mean choosing to start the program and sticking with it until completion. |
| **Innovation Domain**  **CFIR construct:**   - **Innovation Relative Advantage** - **Innovation Adaptability** - **Innovation Design** - **Innovation Cost** | - **Innovation Relative Advantage** - How does the program compare to current practice or other parenting support options that may have been considered, or that you know about at your organisation? *[focus on how this program is better/worse]* - **Innovation Adaptability** - How adaptable or tailorable is the program to the needs of parents? *[what features make it so?]* - How adaptable/tailorable is the program to the organisation’s needs? - **Innovation Design** - Consider the program and the materials and resources that are provided with it. How well-designed is the program and its clinician-training components? Including look and feel. - How might this design affect implementation in your organisation? - **Innovation Cost** - What costs do you imagine could be incurred to implement the program? - How affordable do you imagine it would be? |
| **Inner Setting Domain**  **CFIR construct:**   - **Tension for Change** - **Relative Priority** - **Compatibility** - **Learning Centeredness** - **Incentive Systems** - **Mission Alignment** - **Available Resources** - **Access to Knowledge and Information** | - What do you think would be the general level of receptiveness in your organisation to implementing this program? - If you imagine implementing the program into usual service provision, how complicated do you think it would be? - **Tension for Change** - To what extent is the program needed to meet the needs of parents at your organisation? - How do staff and parents at your organisation feel about current parenting programs or practices that are available for parents seeking mental health support? *[focus on what is missing/lacking]* - **Relative Priority** - What is the priority of implementing and delivering this program compared to other initiatives? - What kinds of things appear to have the highest priority for you and the organisation? - **Compatibility** - How well does the program seem to fit with existing work processes and practices in your organisation? - What (if any) changes or alterations need to be made so the program will:   - work effectively in your existing organisation?   - meet parent needs?   - meet staff needs? - **Learning Centeredness** - To what extent do you feel like your organisation has shared values and norms around trying new things to improve and building on current work practices? - **Incentive Systems** - What incentives or disincentives are there that may influence implementation of the program? *This may include performance reviews, promotions, mandates, rewards or punishments.* - **Mission Alignment** - How does implementing this program align or not align with other organisational goals you currently have? With the mission and goals of the organisation as a whole? - **Available Resources** - To what extent are necessary resources available within your organisation to implement the program? E.g., funding/materials - Which resources are sufficient, and which are currently insufficient? - **Access to Knowledge and Information** - What are your thoughts about the training available to support implementation of the program? - What kinds of supervision and guidance are available at your organisation to support implementation of the program? - What supervision, guidance or training is missing? |
| **Individuals Domain**  **CFIR construct:**   - **High & Mid-level Leaders** - **Innovation Deliverers - Capability** - **Innovation Deliverers - Opportunity** - **Innovation Deliverers - Motivation** | - **High & Mid-level Leaders** - What kind of support or actions would you expect from supervisors/team leaders/managers at your organisation to help make the program implementation successful? *[ask separately about service managers vs team leaders]* - What is available? What is needed? - **Innovation Deliverers - Capability** - To what extent do clinicians have the competence, knowledge and skills to implement the program and engage in the clinician-support component? - **Innovation Deliverers - Opportunity** - To what extent do clinicians have the availability, scope and time to implement the program and engage in the clinician-support component? - **Innovation Deliverers - Motivation** - To what extent do you think clinicians will be committed and motivated to implementing the program? - What kinds of strategies do you think are needed to get staff on board with implementing the program along with other services? |
| **Other suggestions** | - Is there anything else you’d like to feedback about the program, or potential barriers and enablers to implementation? - Any final questions or comments? |
| **Conclusion** | - Conclude and sum up key insights - Remind of member checking of transcripts - Thank for time |

# Supplementary File 2 – CFIR Results and Additional Illustrative Quotes

## CFIR Facilitator Results and Additional Illustrative Quotes

| **CFIR Domain** | **CFIR Construct:**  Study-specific facilitator theme | **Illustrative quotes** |
| --- | --- | --- |
| **Individuals Domain** | |  |
|  | Innovation deliverers’ capability: Clinician skills and experience. | “Our clinicians are trained in mental health impact… child development… basic parenting skills… We're not going to be starting from scratch.” [Clinician 9]  “From the clinician perspective… it feels like something I could support, even without that intensive background in parenting.” [Clinician 6]  “You can relate a little bit more to the client because you've been in their position. Whether or not you had a mental health issue you've still got… a young child, and you've been through that. So you know how hard it is. Sometimes that can just be enough.” [Clinician 3] |
|  | Innovation deliverers’ motivation: Clinicians who find parenting interesting and important. | “This is an area of interest for me. So I would be really excited about doing the training and building my confidence.” [Clinician 6]  “If it's an interest for them, like… we obviously were interested in addictions. But… mental health and children, and parenting is also important to us, or something that we're passionate about.” [Clinician 3] |
|  | Innovation recipients’ opportunity: Parent emotional capacity and access to technology. | “For… clients who are on… the maintenance… side of things… they've gone back into working… this would work really well… they have the time, they have the motivation. They don't have the other sort of pressures and now, they're focusing on rebuilding that relationship with their family and their kids.” [Clinician 5]  “If it was pre-COVID, I might sort of say… that technology sort of stuff, like people are not going to be used to it, but now that we've gone through that… people have become quite familiar with it.” [Manager 2] |
|  | Innovation recipients’ motivation: Parent openness to parenting support and online mediums. | “There's families who are motivated, want to engage.” [Manager 3]  “A lot of stuff is podcasts and online now… People don't have to come in… to go into a group setting… It's just done online when they're ready. It's great… since COVID, it's the new way of learning now, it's a preferred way.” [Clinician 8] |
|  | High-level leaders: Manager endorsement and provision of training time. | “Supporting the tool and… anything that we can think of in terms of people's anxiety around it to kind of allay their fears about some of that stuff.” [Manager 1]  “That acknowledgement that they… understand the value of the program and… that they're supportive of it.” [Clinician 2]  “Them being aware that we will be implementing it in sessions, and that they're open to give us that time to do the training.” [Clinician 3] |
|  | Mid-level leaders: Team leader and supervisor endorsement and support. | “Mentioning in, give updates… in the team meetings.” [Clinician 1]  “Introduce it, encourage clinicians to use it… mention in supervision when needed.” [Clinician 9]  “Supervision of staff is really important… supervisors… reminding people that there's that resource there.” [Manager 2]  “If we do need clinical supervision around it for them to also be available and equipped for that… just going through the training themselves.” [Clinician 6] |
| **Innovation Domain** | | |
|  | Innovation adaptability: Flexible and tailorable. | “It could be… right at the end or in the middle of their sessions, where they were looking at other services… when we will introduce it.” [Clinician 9]  “The reality is most clinicians, and our services are running in business hours are not so much accessible. So it's kind of having that… thing that they might be able to access… when it's suitable for them… because a lot of stressful times for parents isn't during 9 to 5 hours.” [Manager 2]  “You can actually put it down and go back to it…. if you're having a bad week or something, it doesn't matter if you don't pick it up or not… if you can go back to it and join in where you went off last time.” [Manager 1]  “The ability… to watch it at a time when you're available to hear it… you'd probably get a lot of logins at 10:30pm when things are finally quiet… but then to be able to go back and rewatch it… is equally as important.” [Manager 3] |
|  | Innovation design: User-friendly and accessible. | “The language is amazing, very clear, accessible, and personalizing.” [Clinician 4]  “This is way more user friendly than… a manual or a book… more interactive, thought provoking, you're not just visually reading… you're hearing a lot of things… there’s interactive tools.” [Clinician 1]  “All the illustrations are fantastic. I like that… you use… examples of lived experience… there are set goals that parents will do, which is great, there's a quiz. I like the fact that… you raise around barriers and problem-solving activities… and there's the brief summaries of each module.” [Clinician 9]  “This is accessible through phones, tablets, and laptops… most of the time they do have access to some sort of internet device, but at the very least they have a phone.” [Clinician 6]  “The conversation between the clinician and client… is written down… co-created by them… That's a fantastic idea… the fact that it's a partnership… it gives them something tangible to go away with, instead of having to remember.” [Manager 4] |
|  | Innovation design: Helpful content. | “I really liked the topic of the third module actually, expressing warmth, affection, and care towards the child… because I think sometimes when parents are going through their own mental health, that can be a really difficult thing… to bring yourself to do.” [Clinician 6]  “Self-care is important and implementing… all these self-help strategies. I think that's really important.” [Clinician 3]  “A really good tool for parents for capacity building in parenting… and I think from a children's perspective it's giving them a context, an understanding of their parents health condition… they need a bit of an understanding… around that.” [Manager 2]  “It gives direct link numbers to parents or to people… if they are experiencing stress and they've got, perhaps they've got phone numbers to places like lifeline, suicide callback, kids helpline… those resources might be helpful.” [Clinician 2] |
|  | Innovation design: Strengths-based and inclusive. | “I'm looking at the pictures now… You've obviously thought about multiculturalism and including everyone.” [Clinician 8]  “We have a very cultural diverse communities. Be mindful of that and, the pictures that you may use and… there was some diversity there… And I thought oh this is good.” [Clinician 1]  “A program that fosters that strengths based… validates and acknowledges how parents with mental health struggle in their own parenting.” [Clinician 4]  “The lived experience and parenting challenges with the language used are normalised and made more relatable as well.” [Clinician 4] |
|  | Innovation evidence base: Evidence-based information. | “I think an incentive to use it is that you have some evidence behind it.” [Manager 3]  “The intergenerational aspect of mental health and adversity obviously seems to be really strongly emerging from an evidence base that people's mental health conditions inform their parenting style, which triggers the same mental health condition in kids… Acknowledging how a person's mental health condition interacts with their parenting style and helping them do something about that, I think is really powerful.” [Manager 4] |
|  | Innovation relative advantage: Hybrid structure efficiently enhances care. | “Being able to… do the psychoeducation piece outside of the session and then bring their questions in is quite a time saver… we're not having to do that as well as trying to come up with the strategies. We can jump ahead… in the session.” [Clinician 7]  “I like the way it tends to minimise additional work for the practitioner… the combination of self-serve and supported in follow up is a good approach… It also hopefully encourages [parents]… to try to source out what they need first, before going and asking for help.” [Manager 4]  “Mental health is still an area where… there is still stigma around talking about it… This is quite a nice way of kind of breaking that down a little bit… normalising it like you would have a conversation like a parent who might have a chronic health issue” [Manager 2] |
|  | Innovation relative advantage: Consolidates resources. | “I'll send emails to parents and then they're like… ‘I didn't get the email’… and because people are busy, and it's not a priority, and they get tired… But having a thing like this in front of them, they know, I can just go back to… it's an intervention in itself.” [Clinician 8]  “It saves us time from going here and there when everything is in that program.” [Clinician 4]  “Some clinicians have more experience with family and children than what others do. So I think what this program does is that it offers one… consolidated, where we're all walking in the same direction… There's a tool there.” [Clinician 2] |
|  | Innovation relative advantage: Integrates parenting with parental mental health. | “The component here would be that… it's focusing on parents experiencing mental health… [another parenting program] don't have a program around, specifically, the impact of mental health on parenting, so this would be different.” [Clinician 9]  “A program like this reminds the clinician that it's important to talk about parenting and kids in their sessions, that's a big part of our clients lives as well.” [Clinician 5] |
| **Inner Setting Domain** | | |
|  | Access to knowledge and information: Clinician training. | “Familiarising myself with the actual packet… the information that's on there… question prompts to ask parents.” [Clinician 2]  “It would be helpful to have those resources and those… connections or warm referral options as part of the training.” [Clinician 7]  “The other thing is great that we don't have to pay to do the training because that's another barrier for clinicians training these days. So they've always been expensive… We get a certain amount of funds that's allocated to us… generally that amount of funds is only like enough for one [training].” [Clinician 1]  “Maybe fifty-minute, ninety-minute sort of information… in an hour… Because you're not teaching clinician’s parenting skills it's… just understanding what's on each module is and then talking about it.” [Clinician 9] |
|  | Available resources (Materials and Equipment): Existing technology within organisation. | “Internally… they've done remarkably well with technology… even when the clients don't have technology, we can use our own laptops to help them.” [Clinician 4]  “We do have our computers and tablets… if they knew their own password and stuff like that, we could view it… on our screen.” [Manager 1] |
|  | Compatibility: Fits with existing sessions and practices. | “It's part of our… service, doing counselling is also providing that parenting advice and support.” [Clinician 4]  “I like the idea that it's kind of integrated into the work that the parents are doing with their mental health practitioner in the first place, it makes sense because it's really part of… that work. So I think that that's a great idea.” [Manager 4]  “As long as you can make time to do the training and do the follow ups… in session, doing a check in with the client on their progress, or debriefing with them… I think that, isn't, too… time consuming.” [Clinician 6]  “Part of one of the first sessions that we do is an initial assessment… we're looking to identify what the client is here for, what they need help with by asking… some probing questions. So yeah, we'd find that out in the initial assessment.” [Clinician 2] |
|  | Incentive systems: Tangible and intangible incentives for clinicians. | “I wonder if like acknowledgement in a performance appraisals or something like that… Some sort of acknowledgement.” [Clinician 1]  “Obviously, it'd be great to that if they paid you extra for implementing this or something.” [Clinician 3]  “It would be good if you're more likely to have people engage if it doesn’t eat up into our personal development hours.” [Clinician 1]  “I think if it's something that's a bit more mandatory that as a team… we need at least to recruit ten parents.” [Clinician 5] |
|  | Mission alignment: Parent-led and linked with goals. | “If they say… this is something I really want to work on first, then its client based. We work with the client around what their needs are and what they identified as being what they want to work on… if they said at the moment, it's my anxiety is the priority and that's what I want to work on... Then that's what we'd work on and then once they're ready, to introduce their parenting.” [Clinician 9]  “Make it a part of their goal, so that we can also bring it up in the sessions as we go.” [Clinician 5]  “If this is relevant to them being able to achieve their goal, whether that goal be to stop gambling or to reduce the gambling. And their mental health issues and things that are occurring within the home with their kids… these are triggers, then absolutely, I'd be open to… helping them with it.” [Clinician 3] |
|  | Tension for change: Program needed to fill gaps in care. | “I don't think I've come across something like this for parenting support… there are other parenting support programs that we refer to outside of [the organisation] … or we might refer them to services that offer one-on-one parenting but that's sort of referring them out, is externalising that support. Within our scope, I think our parenting support is quite limited.” [Clinician 6]  “Some of these programs are external… some… have access issues around waiting lists and or they're just not on when you need them to be.” [Manager 1]  “It is a bit of a gap that parent children sort of stuff… this tool helps with maybe meeting some of that gap… the focus is still on that critical end of mental health and the stuff around the community mental health stuff… has sort of gone a bit quiet at the moment in terms of the reforms and… funding services.” [Manager 2] |
| **Implementation Process Domain** | | |
|  | Doing: Trial program and make improvements. | “I'm not sure… I would have to probably give it a go like go through it step by step and see.” [Clinician 3]  “I think we'd have to have people doing it till we understood that.” [Manager 1]  “We're trying to move towards learning health cycle… for implementing something new like this, that would be great, because there's the opportunity to understand why we're doing it, what we hope to achieve, did we achieve it, what were the challenges and then you go into another learning health cycle” [Manager 4] |
|  | Engaging deliverers: Program summary and reminders for clinicians. | “As someone who's facilitating the program, I need to understand… Why am I suggesting this? Why are we using these interventions? What is the merit of it, or what is the expected outcome?” [Clinician 6]  “Have it on their computer… an easy way for them to… be able to promote that to the parents… cause it's very easy for clinicians to forget about it… there might be a small percentage of clients will just come for parenting, most of them it's a mental health service… And it's a reminder that if these… parents have also got children, that they can access this package.” [Clinician 9] |
|  | Engaging recipients: Program introduction and support for parents. | “A two-minute video that… we can send a link saying, “…this is something that you might want to do if you're interested” … To summarise it, and to encourage people to use it.” [Clinician 8]  “Promote it as a therapeutic tool… that's going to assist the parent and the child together, so it's inclusive, it's supportive. and it's not focused on guilt or shame.” [Clinician 9]  “Because [the program] is for people who are struggling with their own mental health… it's got to be sold in a way that this is going to benefit you, and then therefore benefit your children.” [Manager 1]  “If there was a reward of once you finish this program, like a gift voucher for you and your son to go watch a movie, or like there could be some other rewards… which could be really helpful for people who are struggling.” [Clinician 5]  “Some of them might need help setting that up… on their phone or their computer…. just getting that bit started.” [Clinician 3] |
|  | Reflecting and evaluating: Evaluate program outcomes | “Measuring the outcome for the parent… the quality of it, whether it… was helpful. And you know whether they found, they had time to be able to do it… their feedback would determine… whether it's helpful.” [Clinician 2]  “Understanding who's using these things and what they're getting out of them is completely separated from everything else we're keeping and recording about the client… if we could integrate in a way that allowed us to actually track who was using the program, how much they were spending time on it… so it was easier to run reports on.” [Manager 4] |
|  | Teaming: Team collaboration and referrals. | “Who's actually supporting the families to do the program, and then who is promoting the program… any… services could promote the program and that doesn't cost us anything… could support a family to access that and internal referral, that kind of thing.” [Manager 3]  “Being able to say, ‘Okay, the wellbeing coordinator is well versed in what's on in the area for parents and young children. We can just refer straight to them’ kind of thing, instead of us… reinventing the wheel… those sorts of referrals and case management practices are important.” [Clinician 7] |
| **Outer Setting Domain** | | |
|  | Local conditions: Community organisations | “If our clients don't have IT… we need to be connecting our clients to their local libraries and stuff like that which is a resource… you can take your children there and introduce them to… books and stuff because there's heaps of stuff that happens in libraries.” [Manager 2] |

## CFIR Barrier and Suggested Improvement Results and Additional Illustrative Quotes

| **CFIR Domain** | **CFIR Construct:**  Study-specific facilitator theme | **Illustrative quotes** |
| --- | --- | --- |
| **Individuals Domain** | | |
|  | Innovation deliverers’ capability: Some clinicians lack personal or professional parenting experience. | “Everyone's experience is gonna be different… some may feel more confident than others… in parenting, in child development.” [Clinician 1]  “Would just vary depending on the clinician… what their background is, what area they work in, do they have children themselves?” [Clinician 3] |
|  | Innovation deliverers’ motivation: Some clinicians lack interest or willingness to support parenting. | “They may not see it as part of their… job or role as a clinician to be looking into parenting.” [Clinician 5]  “I wonder if there was a particular type of person who just felt like this is just not my cup of tea, and it's just not a field I feel comfortable going into.” [Clinician 6] |
|  | Innovation recipients’ opportunity: Poor parental mental health. | “It just depends on the client… if they have low motivation, aren't medicated, can't get out of bed… I've got clients who just are able to get up take their kids to school and then come back and sleep all day. They're not going to be doing something like this.” [Clinician 8]  “If someone was presenting with moderate to severe mental health issues, I don't know if the program would be ideal, or even… they would need additional support, if it was quite severe.” [Clinician 3]  “If they’re struggling to get out of bed, well, they're going to struggle to… engage with the program. So it's maybe working with the person on that first.” [Manager 1] |
|  | Innovation recipients’ opportunity: Competing parent priorities. | “If they're only single parent… might have two or three children… one could be have a disability… or could be taking kids to various appointments, so it could be time and just fatigue… might be a bit of a barrier.” [Clinician 2]  “We're working with working class… Do they have the time?... Both parents are working, they're tired, kids have got extra activities outside of school.” [Clinician 8]  “What we find is parents bring so much into the session and they wanna deal with it all there and there.” [Clinician 1] |
| **Innovation Domain** | | |
|  | Innovation adaptability: Difficult to culturally and linguistically translate digital programs. | “With digital solutions I don't think we're as advanced in understanding cultural differences… The cost of creating more tailored digital solutions can be… high versus the niche of the population that tailoring would serve.” [Manager 4]  “Clients from different cultural backgrounds, where English isn't their first language. I think this might… be quite difficult… so I just wonder if there were clients that might benefit, how we would go about getting this interpreted for them to be able to utilise.” [Clinician 3]  “I didn't notice if there was the ability to translate, any of it? … there's definitely clients… that do speak English quite well, but don't read English very well and so having that option. But then, I suppose there's… cultural layers that have to maybe be added.” [Clinician 7] |
|  | Innovation relative advantage: Digital format may limit accessibility. | “Costs around… access to the internet and a device that's able to manage the content… some families even struggle to access some websites because there's so many graphics.” [Manager 3]  “Certain areas don't have great IT connection… there's a lot of brown spots and black spots in certain parts.” [Manager 2]  “Some people struggle with technology… it depends like do they have to log in… how is it easy for them to access? I think majority parents would be okay, but there would be some that may struggle a little bit.” [Clinician 1] |
|  | Innovation design: Cognitively demanding content pages. | “A lot of our clients… who have mental health issues have undiagnosed ADHD so they can't concentrate… they're not going to read all that.” [Clinician 8]  “There's gonna be a lot of hard work in there… that they have to put in to be able to achieve to support their children... So that can feel quite daunting because I have to put in the work first, before the results will come up.” [Clinician 1]  “The program is… designed around people… who have some level of education which again may not apply to… people we see in [the organisation].” [Clinician 5] |
|  | Suggested Improvements for the Parenting Program | “A really sophisticated digital offering… would be one that was able to collect information from parents about different factors… Do you have mental health challenges? Are you same sex parents? Do you come from a different cultural background?... and then… tailors itself, based on the inputs of the client themselves.” [Manager 4]  “It would need further adaptation if it was to be… taken to the AOD, because, you know, we have probably very limited sort of clients who have their kids… And I thought that it could be modified into talking about mental health as well as the substance use… and what the research says, if it's helpful to be talking about substance use that early on. So I think it adds that extra layer.” [Clinician 5]  “Maybe some other parenting styles can be explained.” [Clinician 4]  “A lot of children whose parents are suffering from mental ill health will likely have their own mental health issues… what supports do we have in place to support the child in that?” [Manager 3]  “I do another program… I get emails telling me the progress of the person… And they’re aware of that… I find that it really really helps my patients… they feel like it's extra support there and they're also accountable.” [Clinician 1]  “If it was possible for them to continue doing that as a support when we already closed, but… you want them to have a place where they can reflect and talk about it.” [Clinician 1] |
| **Inner Setting Domain** | | |
|  | Access to knowledge and information: Limited supervision time to support program implementation. | “A lot of us end up using our supervision for someone is not doing well at all.” [Clinician 6]  “We have some reflective space externally… they have a reflective space that they hold across the organisations running the same program... So if we have capacity, we can attend those, but internal to [the organisation], within our team, we don't have reflective practice anymore.” [Clinician 6] |
|  | Available resources (Funding): Constraints on existing funding models. | “A lot of our programs… only get paid if we see a client, we don't get paid if we've got five hours of training… So… it's also around for us how that's gonna work around our targets and… budget.” [Clinician 9]  “What’s missing is essentially that translation from research into actual practice… needs to involve an economic analysis to say… here are the different funding streams… we can use to pay for this new intervention… Because people would know how to code it when they were recording their statistics against our contractual KPIs.” [Manager 4]  “We're hitting challenges with licensing costs, even, for example, with… some client management system software… because when you scale them up to a large community health service… They become completely cost prohibitive and so, a single practitioner… maybe it works well, but when you start to multiply it out you, it really can get quite cost prohibitive.” [Manager 4] |
|  | Compatibility: Possible misalignment between program and existing session numbers and frequency. | “[The service with capped session numbers] might be a little bit harder again, because it is more limited… It's twelve sessions for a twelve-month period… I already have clients that will say twelve sessions just doesn't feel like enough.” [Clinician 7]  "If you were seeing the client monthly, you might need to see them every two weeks if they were doing this program, and they needed the assistance. So that might be something.” [Clinician 3]  “My aim would be to fit it into the existing sessions. I don't think there is scope to get more sessions for that.” [Clinician 1] |
|  | Relative priority: Multiple competing programs. | “This is not the only program that we've introduced through this time… There's a few others as well that they've been asked to consider and… [clinicians] are also then thinking, well, how many training are we gonna do.” [Clinician 9]  “I don't think that this would be a priority for staff in the [gambling] team… I could see how it would be helpful, more helpful in other teams, but potentially not a priority for our team compared to other things that we could be implementing… support groups… around education.” [Clinician 3] |
|  | Work infrastructure: High clinician workloads. | “Time factor… sometimes when you can be really, really busy, it can be quite difficult to implement more… we've got certain guidelines that we need to see about five clients a day, and that sometimes can be quite tough. So… sometimes it might just be too much to add something else on top for the clinician.” [Clinician 3]  “It's such a variable thing like there's times when we're just super busy that I wouldn't, I barely have time to do an hour [training] session. But then there's other times when I'm so happy to have like seven hours of training to do… So it's a hard one to judge.” [Clinician 7] |
|  | Suggested Improvements for Clinician Training | “Opportunity for people who are administering the program to get together… talk specifically about using the program… how they are supporting their clients… barriers that we might face as clinicians, or… barriers that those clients are facing… Having someone who is part of the development of the program… being part of that would make a lot of sense.” [Clinician 6]  “Following up with clinicians and saying, ‘Is there any questions? Or are you needing a refresher.’ Or… ‘Is there anything that could be clarified?’” [Clinician 1]  “Might be good to schedule… a reflective practice space for us to talk about… implementation of this particular program and how the clinicians are finding it. What works?... Is there any feedback from clients?... Have they even recommended it to clients or used it with clients? What are some of their barriers?” [Clinician 2] |
| **Implementation Process Domain** | | |
|  | Suggested Improvements for Program Implementation | “Even beyond just the mental health team, I think this could be used by a lot of our services… family services could greatly benefit from a program like this… even for teams that are working directly with children… it would be good to have this as an additional resource when they notice that… perhaps it's the parent that needs support.” [Clinician 6]  “The fact that we go out into the home and can talk in terms of the impact… if you're thinking about how family services workers could use this… we could actually sit alongside the parent at the home sort of doing reinforcing… strategies and stuff.” [Manager 2]  “I think it kind of can fit nicely and depending on what service you are you would frame it in a way that meets what your main core business.” [Manager 2]  “Within a family services role. I would be less inclined to say that they would do the clinical aspect of it… They could refer them into the counselling service or the adult services, but at the same time support them to access the program, support them to be able to engage in an appointment… that for me is a place where family services and other services could support this.” [Manager 3] |
